# Supplementary material
Source: PubMed Central journal article supplement (PMC4161365)
Supplement: NIHMS609491-supplement-Supplemental_data.pdf [file NIHMS609491-supplement-Supplemental_data.pdf]

## Supplementary Appendix

This appendix has been provided by the authors to give readers additional information about their work.

Supplement to: Furman RR, Sharman JP, Coutre SE, et al. Idelalisib and rituximab in relapsed chronic lymphocytic leukemia. *N Engl J Med*;370:997-1007. DOI: 10.1056/NEJMoa1315226

## **Idelalisib and Rituximab in Relapsed Chronic Lymphocytic Leukemia**

Richard R. Furman, Jeff P. Sharman, Steven E. Coutre, Bruce D. Cheson, John M. Pagel, Peter Hillmen, Jacqueline C. Barrientos, Andrew D. Zelenetz, Thomas J. Kipps, Ian Flinn, Paolo Ghia, Herbert Eradat, Thomas Ervin, Nicole Lamanna, Bertrand Coiffier, Andrew R. Pettitt, Shuo Ma, Stephan Stilgenbauer, Paula Cramer, Maria Aiello, Dave M. Johnson, Langdon L. Miller, Daniel Li, Thomas M. Jahn, Roger D. Dansey, Michael Hallek, Susan M. O'Brien

This supplement contains the following items:

|                                  |       |
|----------------------------------|-------|
| Table S1                         | p. 2  |
| Figure S1                        | p. 3  |
| Figure S2                        | p. 4  |
| Ipsos Healthcare Research Study* |       |
| Design                           | p. 5  |
| Results                          | p. 6  |
| IntrinsiQ Study*                 |       |
| Design                           | p. 16 |
| Results                          | p. 17 |

*\*Study results reprinted with permission from Ipsos Healthcare Research and IntrinsiQ*

**Table S1. Patient baseline characteristics and disposition**

| <b>Characteristic</b>                                         | <b>Idelalisib + R<br/>(n=110)</b> | <b>Placebo + R<br/>(n=110)</b> |
|---------------------------------------------------------------|-----------------------------------|--------------------------------|
| <b>Age, median (range), years</b>                             | 71 (48-90)                        | 71 (47-92)                     |
| <b>Gender, males, %</b>                                       | 69                                | 62                             |
| <b>Disease stage, %</b>                                       |                                   |                                |
| Rai Stage 0 / I-II / III-IV                                   | 0 / 31 / 64                       | 1 / 26 / 65                    |
| Binet Stage A+B / C                                           | 33 / 57                           | 33 / 55                        |
| <b>Extent of CLL, %</b>                                       |                                   |                                |
| Splenomegaly <sup>a</sup>                                     | 79                                | 64                             |
| Hepatomegaly <sup>a</sup>                                     | 54                                | 57                             |
| Anemia (any grade / grade ≥ 3)                                | 75 / 6                            | 72 / 11                        |
| Neutropenia (any grade / grade ≥ 3)                           | 34 / 17                           | 35 / 16                        |
| Thrombocytopenia (any grade / grade ≥ 3)                      | 62 / 16                           | 61 / 29                        |
| <b>ALC, median (range), cells, x 1K<math>\mu</math>/L</b>     | 32 (0-263)                        | 31 (0-399)                     |
| <b>Estimated creatinine clearance, median (range), ml/min</b> | 62 (32-161)                       | 67 (23-199)                    |
| <b>CLL genetics, %</b>                                        |                                   |                                |
| Unmutated <i>IGHV</i>                                         | 83                                | 85                             |
| del(17p) or TP53 mutation                                     | 42                                | 45                             |
| <b>Total CIRS score, median (range)</b>                       | 8 (3-18)                          | 8 (1-18)                       |
| <b>Prior agents, median, n (range)</b>                        | 3 (1-12)                          | 3 (1-9)                        |
| Rituximab (R), %                                              | 91                                | 88                             |
| Cyclophosphamide (C), %                                       | 64                                | 70                             |
| Fludarabine (F), %                                            | 56                                | 64                             |
| Bendamustine (B), %                                           | 58                                | 54                             |
| Chlorambucil (Chl), %                                         | 31                                | 22                             |
| <b>Prior regimens, %</b>                                      |                                   |                                |
| BR                                                            | 46                                | 43                             |
| FCR                                                           | 33                                | 36                             |
| R monotherapy                                                 | 32                                | 31                             |
| FR                                                            | 16                                | 18                             |
| Chl monotherapy                                               | 18                                | 14                             |
| <b>Patient disposition, %</b>                                 |                                   |                                |
| Randomized                                                    | 100                               | 100                            |
| Ongoing on study                                              | 81                                | 52                             |
| Discontinued study (investigator determination)               |                                   |                                |
| Disease progression                                           | 5                                 | 31                             |
| Death <sup>b</sup>                                            | 3                                 | 8                              |
| Adverse events                                                | 5                                 | 5                              |
| Physician decision                                            | 1                                 | 1                              |
| Withdrawal by subject                                         | 5                                 | 3                              |
| Other                                                         | 1                                 | 0                              |

a Based on 91 patients in idelalisib + R arm and 90 patients in placebo + R arm with baseline assessment completed

b Does not include 1 death on treatment arm and 4 other deaths on control arm that occurred after patients discontinued the study due to adverse event or progression

**Figure S1. KM curves of progression-free survival for select pre-specified patient sub-groups.**

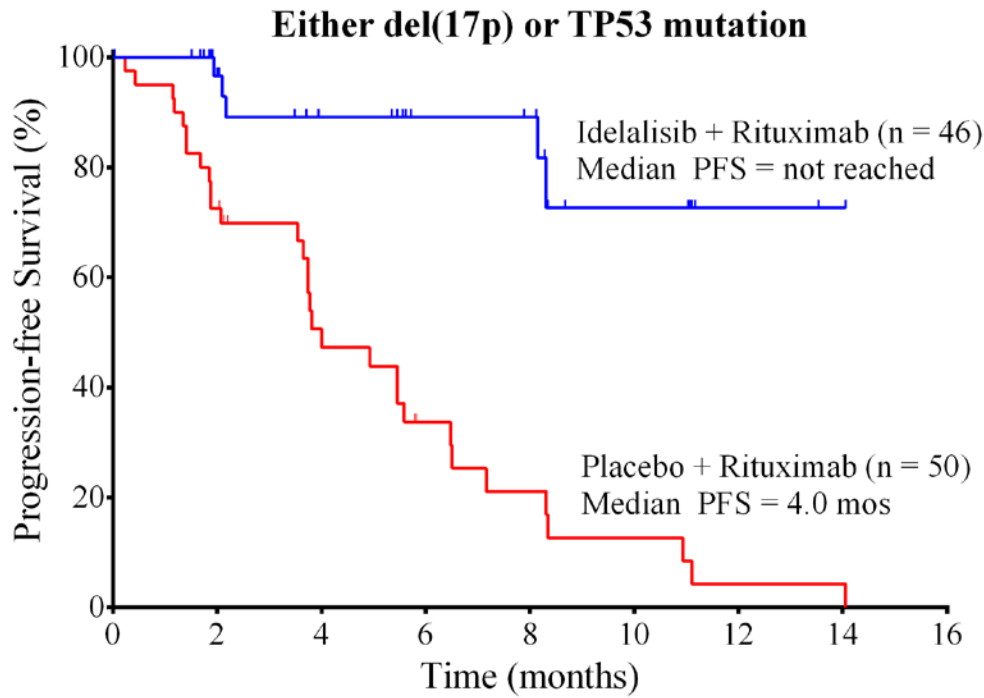

| N at risk (events) |        | 0       | 2       | 4      | 6      | 8      | 10     | 12     | 14     |
|--------------------|--------|---------|---------|--------|--------|--------|--------|--------|--------|
| Idelalisib         | 46 (0) | 28 (1)  | 19 (3)  | 14 (3) | 13 (3) | 6 (5)  | 2 (5)  | 1 (5)  | 0 (5)  |
| Placebo            | 50 (0) | 29 (11) | 15 (18) | 8 (23) | 5 (26) | 3 (28) | 1 (30) | 1 (30) | 0 (31) |

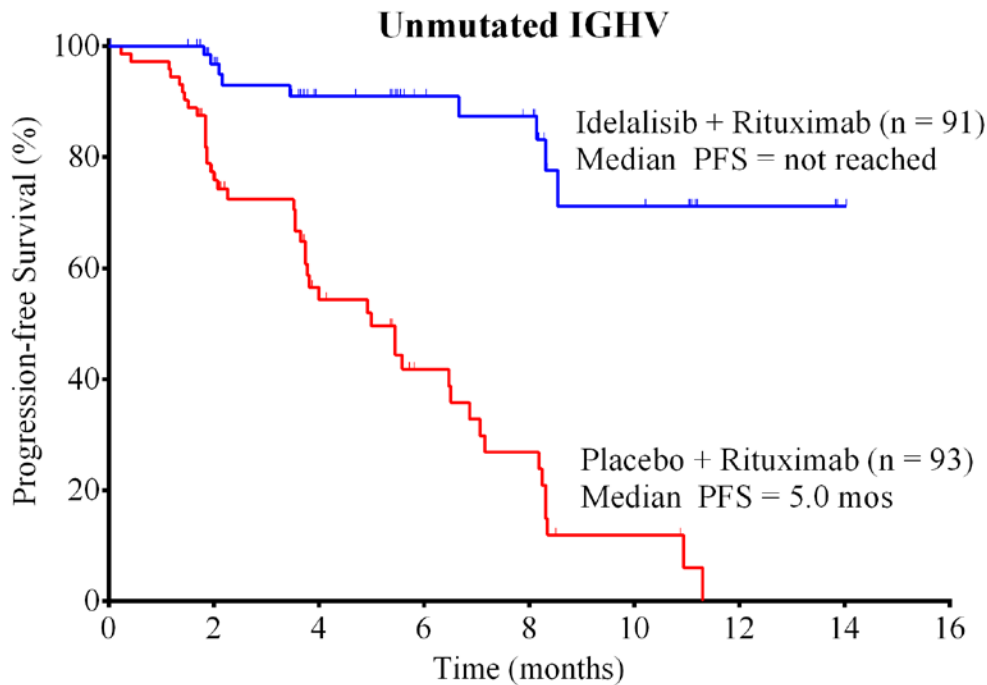

| N at risk (events) |        | 0       | 2       | 4       | 6      | 8      | 10     | 12     | 14     |
|--------------------|--------|---------|---------|---------|--------|--------|--------|--------|--------|
| Idelalisib         | 91 (0) | 55 (2)  | 34 (5)  | 26 (5)  | 23 (6) | 11 (9) | 3 (9)  | 1 (9)  | 0 (9)  |
| Placebo            | 93 (0) | 51 (16) | 25 (27) | 14 (33) | 9 (38) | 3 (43) | 0 (45) | 0 (45) | 0 (45) |

Figure S2. Mean change from baseline of laboratory parameters over time.

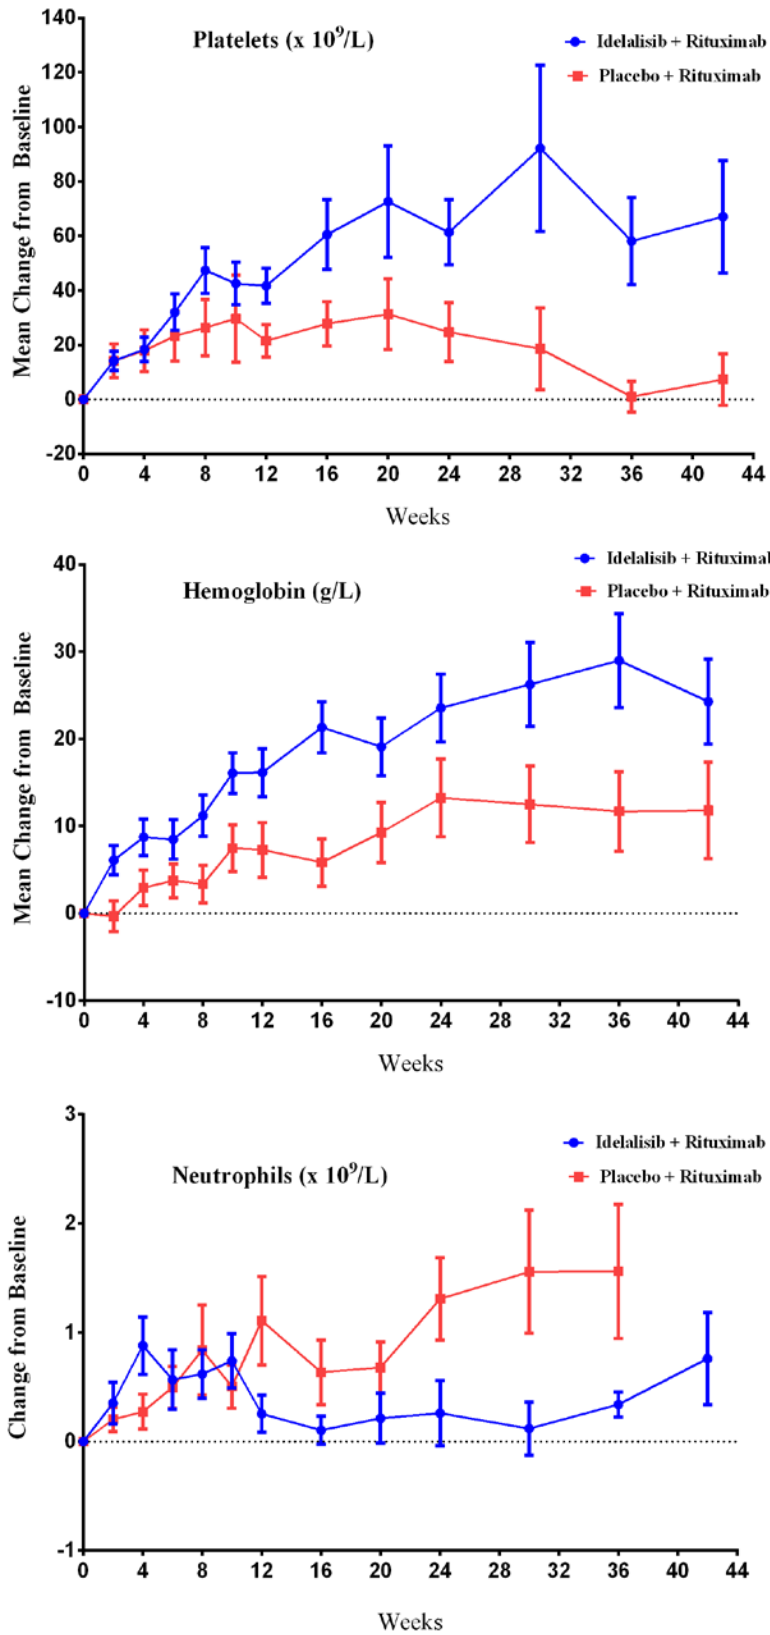

## **Ipsos Healthcare Background**

Ipsos Healthcare (<http://www.ipsos.com/marketing-healthcare/>) is a research organization focused on understanding the motivations, behavior and influences of the multiple stakeholders involved in healthcare industry issues. Research in oncology utilizes a large syndicated database of cancer treatment and includes key patient and treatment-related metrics across all tumor types and more than 20 global markets. Specific data collection can be modeled to clarify complex questions including treatment regimen type, initiation and duration of current and prior therapy, as well as maintenance and sequential therapy.

## **Gilead Project**

Gilead Sciences contracted Ipsos Healthcare to collect data from 5 representative countries in the EU to evaluate trend use of agents/regimens across lines of therapy in chronic lymphocytic leukemia during the years 2010, 2011, 2012, through mid-2013.

## **Methodology**

Ipsos Healthcare projected rituximab use as single-agent therapy or part of combination regimens for the treatment of CLL in EU5 Countries (UK, France, Germany, Italy, and Spain) based on patient diaries. Representative panels of cancer treating physicians (N = 509) completed forms directly from reviews of patients' charts and provided information on how many patients in their practices received certain therapies (either mono-therapies or combination regimens). A total of 104 physicians provided CLL patient information across first-, second-, third-line and beyond CLL treatments. According to their most recent annually projected data, a total of 37,119 patients with CLL are estimated to have been treated in the EU5 with anticancer drug therapy between July 2012 and June 2013.

## **Data Interpretation**

According to the data collected on the above patients, there is higher rituximab monotherapy use in later lines of therapy for CLL (first line, 0.3%; second line, 8.2%, third line or more, 22.1%). It should be noted that the data indicate rituximab use in the EU is now more common in clinical practice than chlorambucil use (22.1% vs 9.2%, respectively) as third-line treatment and above in patients with CLL.

The pertinent excerpt of the data follows, including the following tables: 1) 5EU CLL line 2+ regimens (excluding maintenance treatment) and 2) 5EU CLL Line 3+ regimens.

[TOC](#)

5EU CLL Line 2+ (excluding line 2 maintenance) regimens  
 Projected annual treatments

|                                                                             | Jan 10 -<br>Dec 10 | Apr 10 -<br>Mar 11 | Jul 10 -<br>Jun 11 | Oct 10 -<br>Sep 11 | Jan 11 -<br>Dec 11 | Apr 11 -<br>Mar 12 | Jul 11 -<br>Jun 12 | Oct 11 -<br>Sep 12 | Jan 12 -<br>Dec 12 | Apr 12 -<br>Mar 13 | Jul 12 -<br>Jun 13 |
|-----------------------------------------------------------------------------|--------------------|--------------------|--------------------|--------------------|--------------------|--------------------|--------------------|--------------------|--------------------|--------------------|--------------------|
| <b>Sample base</b>                                                          | <b>392</b>         | <b>327</b>         | <b>296</b>         | <b>329</b>         | <b>333</b>         | <b>418</b>         | <b>480</b>         | <b>484</b>         | <b>474</b>         | <b>438</b>         | <b>420</b>         |
| <b>Projected</b>                                                            | <b>10791</b>       | <b>11233</b>       | <b>13224</b>       | <b>14392</b>       | <b>15225</b>       | <b>16870</b>       | <b>16832</b>       | <b>16588</b>       | <b>17160</b>       | <b>15916</b>       | <b>14974</b>       |
| Bendamustine/ Rituximab                                                     | 2094<br>19%        | 2781<br>25%        | 3528<br>27%        | 4027<br>28%        | 4057<br>27%        | 4455<br>26%        | 4776<br>28%        | 5401<br>33%        | 5683<br>33%        | 5078<br>32%        | 4943<br>33%        |
| Cyclophosphamide/ Fludarabine/<br>Rituximab                                 | 2756<br>26%        | 2711<br>24%        | 2498<br>19%        | 2507<br>17%        | 2557<br>17%        | 3021<br>18%        | 3309<br>20%        | 3152<br>19%        | 3443<br>20%        | 2775<br>17%        | 2333<br>16%        |
| Chlorambucil                                                                | 607<br>6%          | 521<br>5%          | 1009<br>8%         | 1263<br>9%         | 1634<br>11%        | 1786<br>11%        | 1463<br>9%         | 1226<br>7%         | 1279<br>7%         | 1387<br>9%         | 1130<br>8%         |
| <b>Rituximab</b>                                                            | <b>303<br/>3%</b>  | <b>201<br/>2%</b>  | <b>132<br/>1%</b>  | <b>152<br/>1%</b>  | <b>168<br/>1%</b>  | <b>250<br/>1%</b>  | <b>478<br/>3%</b>  | <b>672<br/>4%</b>  | <b>873<br/>5%</b>  | <b>1200<br/>8%</b> | <b>1167<br/>8%</b> |
| Fludarabine                                                                 | 317<br>3%          | 236<br>2%          | 253<br>2%          | 322<br>2%          | 313<br>2%          | 433<br>3%          | 469<br>3%          | 545<br>3%          | 908<br>5%          | 896<br>6%          | 793<br>5%          |
| Bendamustine                                                                | 202<br>2%          | 104<br>1%          | 195<br>1%          | 262<br>2%          | 406<br>3%          | 754<br>4%          | 863<br>5%          | 947<br>6%          | 902<br>5%          | 740<br>5%          | 694<br>5%          |
| Fludarabine/ Rituximab                                                      | 155<br>1%          | 149<br>1%          | 136<br>1%          | 136<br>1%          | 121<br>1%          | 66<br>*            | 53<br>*            | 88<br>1%           | 125<br>1%          | 329<br>2%          | 463<br>3%          |
| Ofatumumab                                                                  | 102<br>1%          | 102<br>1%          | 95<br>1%           | 110<br>1%          | 82<br>1%           | 96<br>1%           | 140<br>1%          | 139<br>1%          | 265<br>2%          | 333<br>2%          | 458<br>3%          |
| Chlorambucil/ Rituximab                                                     | 429<br>4%          | 329<br>3%          | 418<br>3%          | 345<br>2%          | 532<br>3%          | 748<br>4%          | 680<br>4%          | 611<br>4%          | 492<br>3%          | 344<br>2%          | 381<br>3%          |
| Chlorambucil/ Prednis(ol)one                                                | 377<br>3%          | 321<br>3%          | 428<br>3%          | 509<br>4%          | 521<br>3%          | 557<br>3%          | 389<br>2%          | 281<br>2%          | 251<br>1%          | 341<br>2%          | 374<br>2%          |
| Prednis(ol)one                                                              | -<br>-             | -<br>-             | 198<br>1%          | 370<br>3%          | 522<br>3%          | 672<br>4%          | 545<br>3%          | 478<br>3%          | 442<br>3%          | 359<br>2%          | 415<br>3%          |
| Alemtuzumab                                                                 | 448<br>4%          | 316<br>3%          | 394<br>3%          | 380<br>3%          | 459<br>3%          | 548<br>3%          | 548<br>3%          | 504<br>3%          | 412<br>2%          | 340<br>2%          | 308<br>2%          |
| Cyclophosphamide/ Doxorubicin/<br>Prednis(ol)one/ Rituximab/<br>Vincristine | 255<br>2%          | 255<br>2%          | 218<br>2%          | 34<br>*            | 48<br>*            | 68<br>*            | 114<br>1%          | 128<br>1%          | 117<br>1%          | 204<br>1%          | 178<br>1%          |
| Cyclophosphamide/ Prednis(ol)one/<br>Vincristine                            | 133<br>1%          | 239<br>2%          | 220<br>2%          | 160<br>1%          | 177<br>1%          | 59<br>*            | 91<br>1%           | 55<br>*            | 60<br>*            | 194<br>1%          | 163<br>1%          |
| Cyclophosphamide/ Prednis(ol)one/<br>Rituximab/ Vincristine                 | 248<br>2%          | 290<br>3%          | 280<br>2%          | 330<br>2%          | 348<br>2%          | 503<br>3%          | 525<br>3%          | 379<br>2%          | 317<br>2%          | 95<br>1%           | 93<br>1%           |
| Melphalan                                                                   | -                  | -                  | -                  | -                  | -                  | -                  | -                  | -                  | 34                 | 54                 | 54                 |

|                                                                    | Jan 10 -<br>Dec 10 | Apr 10 -<br>Mar 11 | Jul 10 -<br>Jun 11 | Oct 10 -<br>Sep 11 | Jan 11 -<br>Dec 11 | Apr 11 -<br>Mar 12 | Jul 11 -<br>Jun 12 | Oct 11 -<br>Sep 12 | Jan 12 -<br>Dec 12 | Apr 12 -<br>Mar 13 | Jul 12 -<br>Jun 13 |
|--------------------------------------------------------------------|--------------------|--------------------|--------------------|--------------------|--------------------|--------------------|--------------------|--------------------|--------------------|--------------------|--------------------|
| Cyclophosphamide/<br>Methylprednisolone/ Rituximab/<br>Vincristine | -<br>77<br>1%      | -<br>-             | -<br>-             | -<br>-             | -<br>83<br>1%      | -<br>83<br>*       | -<br>105<br>1%     | -<br>105<br>1%     | *<br>22<br>*       | *<br>45<br>*       | *<br>43<br>*       |
| Mercaptopurine/ Prednis(ol)one                                     | -<br>-             | -<br>-             | -<br>-             | 8<br>*             | 8<br>*             | 8<br>*             | 8<br>*             | -<br>-             | 22<br>*            | 22<br>*            | 41<br>*            |
| Mercaptopurine/ Rituximab                                          | -<br>-             | -<br>-             | -<br>-             | -<br>-             | 14<br>*            | 43<br>*            | 43<br>*            | 101<br>1%          | 108<br>1%          | 98<br>1%           | 98<br>1%           |
| Cyclophosphamide/ Doxorubicin/<br>Prednis(ol)one/ Rituximab        | -<br>-             | 38<br>*            | 38<br>*            | 38<br>*            |
| Cyclophosphamide/ Pentostatin/<br>Rituximab                        | 47<br>*            | 85<br>1%           | 114<br>1%          | 193<br>1%          | 160<br>1%          | 146<br>1%          | 102<br>1%          | 22<br>*            | 22<br>*            | -<br>-             | 36<br>*            |
| Cisplatin/ Cytarabine                                              | -<br>-             | 33<br>*            |
| Bendamustine/ Dexamethasone/<br>Rituximab                          | 33<br>*            | 33<br>*            | 33<br>*            | 33<br>*            | 21<br>*            | 21<br>*            | 21<br>*            | 21<br>*            | -<br>-             | -<br>-             | 32<br>*            |
| Chlorambucil/ Dexamethasone                                        | -<br>-             | 32<br>*            |
| Bendamustine/ Cytarabine/<br>Rituximab                             | -<br>-             | 32<br>*            |
| Cyclophosphamide/ Rituximab                                        | 147<br>1%          | 184<br>2%          | 262<br>2%          | 341<br>2%          | 210<br>1%          | 172<br>1%          | 95<br>1%           | -<br>-             | -<br>-             | -<br>-             | 32<br>*            |
| Cyclophosphamide/ Fludarabine                                      | 441<br>4%          | 340<br>3%          | 360<br>3%          | 471<br>3%          | 511<br>3%          | 491<br>3%          | 423<br>3%          | 328<br>2%          | 236<br>1%          | 238<br>1%          | 94<br>1%           |
| Cyclophosphamide/ Ofatumumab/<br>Pentostatin                       | -<br>-             | 31<br>*            | 31<br>*            |
| Lenalidomide                                                       | 18<br>*            | 18<br>*            | -<br>-             | 27<br>*            | 27<br>*            | 27<br>*            | 27<br>*            | -<br>-             | -<br>-             | -<br>-             | 31<br>*            |
| Bendamustine/ Methylprednisolone/<br>Ofatumumab                    | -<br>-             | 30<br>*            |
| Doxorubicin                                                        | -<br>-             | 28<br>*            | 28<br>*            | 28<br>*            |
| Cyclophosphamide/ Doxorubicin/<br>Vincristine                      | 54<br>*            | 54<br>*            | 36<br>*            | 36<br>*            | -<br>-             | -<br>-             | -<br>-             | -<br>-             | 28<br>*            | 28<br>*            | 28<br>*            |
| Alemtuzumab/ Dexamethasone                                         | 20<br>*            | -<br>-             | 104<br>1%          | 104<br>1%          | 104<br>1%          | 175<br>1%          | 71<br>*            | 86<br>1%           | 86<br>*            | 14<br>*            | 40<br>*            |
| Cortisone/ Mercaptopurine                                          | -<br>-             | 7<br>*             | 28<br>*            | 28<br>*            | 28<br>*            |
| Mercaptopurine/ Prednis(ol)one/<br>Rituximab                       | -<br>-             | -<br>-             | -<br>-             | 54<br>*            | 54<br>*            | 54<br>*            | 54<br>*            | 64<br>*            | 64<br>*            | 64<br>*            | 83<br>1%           |







|                                                        | Jan 10 -<br>Dec 10 | Apr 10 -<br>Mar 11 | Jul 10 -<br>Jun 11 | Oct 10 -<br>Sep 11 | Jan 11 -<br>Dec 11 | Apr 11 -<br>Mar 12 | Jul 11 -<br>Jun 12 | Oct 11 -<br>Sep 12 | Jan 12 -<br>Dec 12 | Apr 12 -<br>Mar 13 | Jul 12 -<br>Jun 13 |
|--------------------------------------------------------|--------------------|--------------------|--------------------|--------------------|--------------------|--------------------|--------------------|--------------------|--------------------|--------------------|--------------------|
| Cyclophosphamide/ Rituximab/<br>Vincristine            | 38<br>*            | 112<br>1%          | 112<br>1%          | 112<br>1%          | 75<br>*            | -<br>-             | -<br>-             | -<br>-             | -<br>-             | -<br>-             | -<br>-             |
| Cytarabine/ Dexamethasone/<br>Oxaliplatin              | -<br>-             | 90<br>1%           | 90<br>1%           | 90<br>1%           | 90<br>1%           | -<br>-             | -<br>-             | -<br>-             | -<br>-             | -<br>-             | -<br>-             |
| Cytarabine/ Dexamethasone/<br>Oxaliplatin/ Rituximab   | 33<br>*            | 33<br>*            | 33<br>*            | 33<br>*            | -<br>-             |
| Cytarabine/ Fludarabine/ Rituximab                     | -<br>-             | -<br>-             | 27<br>*            | 27<br>*            | 27<br>*            | 27<br>*            | -<br>-             | -<br>-             | -<br>-             | -<br>-             | -<br>-             |
| Dexamethasone                                          | 15<br>*            | -<br>-             |
| Dexamethasone/ Doxorubicin/<br>Vincristine             | 38<br>*            | 38<br>*            | 38<br>*            | -<br>-             |
| Dexamethasone/ Fludarabine                             | -<br>-             | -<br>-             | -<br>-             | -<br>-             | 100<br>1%          | 100<br>1%          | 100<br>1%          | 100<br>1%          | -<br>-             | -<br>-             | -<br>-             |
| Dexamethasone/ Fludarabine/<br>Mitoxantrone/ Rituximab | 10<br>*            | -<br>-             |
| Dexamethasone/ Rituximab                               | 31<br>*            | -<br>-             | -<br>-             | -<br>-             | -<br>-             | 30<br>*            | 30<br>*            | 30<br>*            | 30<br>*            | -<br>-             | -<br>-             |
| Etoposide/ Ifosfamide/ Mitoxantrone/<br>Rituximab      | -<br>-             | -<br>-             | -<br>-             | -<br>-             | -<br>-             | -<br>-             | 14<br>*            | 14<br>*            | 14<br>*            | 14<br>*            | -<br>-             |
| Fludarabine/ Lenalidomide/<br>Rituximab/ Thalidomide   | 33<br>*            | 33<br>*            | 18<br>*            | 18<br>*            | -<br>-             |
| Fludarabine/ Mitoxantrone/<br>Rituximab                | -<br>-             | 90<br>1%           | 193<br>1%          | 193<br>1%          | 193<br>1%          | 104<br>1%          | -<br>-             | -<br>-             | -<br>-             | -<br>-             | -<br>-             |
| Fludarabine/ Prednis(ol)one                            | -<br>-             | -<br>-             | -<br>-             | -<br>-             | 17<br>*            | 17<br>*            | 17<br>*            | 17<br>*            | -<br>-             | -<br>-             | -<br>-             |
| Fludarabine/ Treosulfan                                | 187<br>2%          | 187<br>2%          | 157<br>1%          | 118<br>1%          | -<br>-             |
| Gemcitabine/ Oxaliplatin/ Rituximab                    | 78<br>1%           | 78<br>1%           | 78<br>1%           | -<br>-             |
| Gemcitabine/ Vinblastine                               | 93<br>1%           | 93<br>1%           | -<br>-             |
| Interferon Alpha 2b                                    | -<br>-             | -<br>-             | -<br>-             | 16<br>*            | 16<br>*            | 16<br>*            | 16<br>*            | -<br>-             | -<br>-             | -<br>-             | -<br>-             |
| L-Asparaginase/ Methotrexate                           | 33<br>*            | 33<br>*            | 33<br>*            | 33<br>*            | -<br>-             |
| Melphalan/ Prednis(ol)one                              | -<br>-             | -<br>-             | -<br>-             | -<br>-             | 33<br>*            | 33<br>*            | 33<br>*            | 33<br>*            | -<br>-             | -<br>-             | -<br>-             |
| Mercaptopurine                                         | -<br>-             | 42<br>-            | 42<br>-            | 42<br>-            | 42<br>-            | 9<br>-             | 9<br>-             | 9<br>-             | 9<br>-             | -<br>-             | -<br>-             |

|                               | Jan 10 -<br>Dec 10 | Apr 10 -<br>Mar 11 | Jul 10 -<br>Jun 11 | Oct 10 -<br>Sep 11 | Jan 11 -<br>Dec 11 | Apr 11 -<br>Mar 12 | Jul 11 -<br>Jun 12 | Oct 11 -<br>Sep 12 | Jan 12 -<br>Dec 12 | Apr 12 -<br>Mar 13 | Jul 12 -<br>Jun 13 |
|-------------------------------|--------------------|--------------------|--------------------|--------------------|--------------------|--------------------|--------------------|--------------------|--------------------|--------------------|--------------------|
| mercaptopurine                | -                  | *                  | *                  | *                  | *                  | *                  | *                  | *                  | *                  | -                  | -                  |
| Methotrexate                  | 18                 | 18                 | 18                 | 18                 | -                  | -                  | -                  | -                  | -                  | -                  | -                  |
| Methylprednisolone            | 60<br>1%           | 60<br>1%           | 33<br>*            | 14<br>*            | -                  | -                  | 13<br>*            | 13<br>*            | 13<br>*            | 13<br>*            | -                  |
| Methylprednisolone/ Rituximab | -                  | -                  | -                  | -                  | -                  | -                  | 105<br>1%          | 105<br>1%          | 105<br>1%          | 105<br>1%          | -                  |
| Pentostatin                   | -                  | -                  | -                  | 8<br>*             | 59<br>*            | 59<br>*            | 59<br>*            | 50<br>*            | -                  | -                  | -                  |
| Pentostatin/ Rituximab        | 19<br>*            | 19<br>*            | 19<br>*            | 19<br>*            | -                  | 30<br>*            | 30<br>*            | 30<br>*            | 30<br>*            | -                  | -                  |
| Prednis(ol)one/ Rituximab     | -                  | -                  | -                  | 15<br>*            | 15<br>*            | 15<br>*            | 15<br>*            | 40<br>*            | 40<br>*            | 40<br>*            | 40<br>*            |
| Rituximab/ Temsirolimus       | -                  | -                  | 8<br>*             | 8<br>*             | 8<br>*             | 8<br>*             | -                  | -                  | -                  | -                  | -                  |
| Temozolomide                  | 31<br>*            | -                  | -                  | -                  | -                  | -                  | -                  | -                  | -                  | -                  | -                  |
| Trial Drug (Bio)              | -                  | -                  | -                  | -                  | -                  | -                  | 71<br>*            | 87<br>1%           | 87<br>1%           | 87<br>1%           | 17<br>*            |

[TOC](#)

5EU CLL Line 3+ regimens  
Projected annual treatments

|                                                                          | Jan 10 -<br>Dec 10 | Apr 10 -<br>Mar 11 | Jul 10 -<br>Jun 11 | Oct 10 -<br>Sep 11 | Jan 11 -<br>Dec 11 | Apr 11 -<br>Mar 12 | Jul 11 -<br>Jun 12 | Oct 11 -<br>Sep 12 | Jan 12 -<br>Dec 12 | Apr 12 -<br>Mar 13 | Jul 12 -<br>Jun 13 |
|--------------------------------------------------------------------------|--------------------|--------------------|--------------------|--------------------|--------------------|--------------------|--------------------|--------------------|--------------------|--------------------|--------------------|
| <b>Sample base</b>                                                       | <b>140</b>         | <b>117</b>         | <b>106</b>         | <b>109</b>         | <b>99</b>          | <b>125</b>         | <b>129</b>         | <b>125</b>         | <b>126</b>         | <b>124</b>         | <b>134</b>         |
| <b>Projected</b>                                                         | <b>3947</b>        | <b>4284</b>        | <b>5090</b>        | <b>5199</b>        | <b>4973</b>        | <b>5250</b>        | <b>4799</b>        | <b>4696</b>        | <b>4946</b>        | <b>5103</b>        | <b>5163</b>        |
| Bendamustine/ Rituximab                                                  | 799<br>20%         | 1015<br>24%        | 1353<br>27%        | 1575<br>30%        | 1313<br>26%        | 1370<br>26%        | 1284<br>27%        | 1469<br>31%        | 1737<br>35%        | 1651<br>32%        | 1598<br>31%        |
| Rituximab                                                                | 145<br>4%          | 66<br>2%           | 9<br>*             | 85<br>2%           | 102<br>2%          | 199<br>4%          | 405<br>8%          | 573<br>12%         | 781<br>16%         | 1112<br>22%        | 1141<br>22%        |
| Chlorambucil                                                             | 248<br>6%          | 225<br>5%          | 348<br>7%          | 365<br>7%          | 400<br>8%          | 465<br>9%          | 369<br>8%          | 409<br>9%          | 457<br>9%          | 504<br>10%         | 473<br>9%          |
| Ofatumumab                                                               | 102<br>3%          | 102<br>2%          | 95<br>2%           | 110<br>2%          | 67<br>1%           | 82<br>2%           | 115<br>2%          | 83<br>2%           | 171<br>3%          | 212<br>4%          | 333<br>6%          |
| Prednis(ol)one                                                           | -<br>-             | -<br>-             | 198<br>4%          | 316<br>6%          | 413<br>8%          | 489<br>9%          | 362<br>8%          | 320<br>7%          | 340<br>7%          | 331<br>6%          | 366<br>7%          |
| Fludarabine/ Rituximab                                                   | 90<br>2%           | 41<br>1%           | -<br>-             | 118<br>2%          | 151<br>3%          |
| Cyclophosphamide/ Doxorubicin/<br>Prednis(ol)one/ Rituximab/ Vincristine | 170<br>4%          | 170<br>4%          | 185<br>4%          | 34<br>1%           | 48<br>1%           | 48<br>1%           | 33<br>1%           | 47<br>1%           | 14<br>*            | 122<br>2%          | 156<br>3%          |
| Bendamustine                                                             | 97<br>2%           | 74<br>2%           | 61<br>1%           | 61<br>1%           | 77<br>2%           | 124<br>2%          | 114<br>2%          | 212<br>5%          | 179<br>4%          | 191<br>4%          | 239<br>5%          |
| Fludarabine                                                              | 77<br>2%           | 56<br>1%           | 50<br>1%           | 92<br>2%           | 73<br>1%           | 96<br>2%           | 65<br>1%           | 55<br>1%           | 128<br>3%          | 173<br>3%          | 173<br>3%          |
| Chlorambucil/ Rituximab                                                  | 186<br>5%          | 125<br>3%          | 157<br>3%          | 53<br>1%           | 103<br>2%          | 222<br>4%          | 190<br>4%          | 169<br>4%          | 119<br>2%          | 68<br>1%           | 101<br>2%          |
| Chlorambucil/ Prednis(ol)one                                             | 151<br>4%          | 155<br>4%          | 241<br>5%          | 251<br>5%          | 281<br>6%          | 317<br>6%          | 225<br>5%          | 169<br>4%          | 105<br>2%          | 62<br>1%           | 50<br>1%           |
| Cyclophosphamide/ Pentostatin/<br>Rituximab                              | 33<br>1%           | 33<br>1%           | 33<br>1%           | 33<br>1%           | -<br>-             | 22<br>*            | 22<br>*            | 22<br>*            | 22<br>*            | -<br>-             | 36<br>1%           |
| Cisplatin/ Cytarabine                                                    | -<br>-             | 33<br>1%           |
| Bendamustine/ Cytarabine/ Rituximab                                      | -<br>-             | 32<br>1%           |
| Lenalidomide                                                             | 18<br>*            | 18<br>*            | -<br>-             | 27<br>1%           | 27<br>1%           | 27<br>1%           | 27<br>1%           | -<br>-             | -<br>-             | -<br>-             | 31<br>1%           |
| Doxorubicin                                                              | -                  | -                  | -                  | -                  | -                  | -                  | -                  | -                  | 28                 | 28                 | 28                 |





|                                                      | Jan 10 -<br>Dec 10 | Apr 10 -<br>Mar 11 | Jul 10 -<br>Jun 11 | Oct 10 -<br>Sep 11 | Jan 11 -<br>Dec 11 | Apr 11 -<br>Mar 12 | Jul 11 -<br>Jun 12 | Oct 11 -<br>Sep 12 | Jan 12 -<br>Dec 12 | Apr 12 -<br>Mar 13 | Jul 12 -<br>Jun 13 |
|------------------------------------------------------|--------------------|--------------------|--------------------|--------------------|--------------------|--------------------|--------------------|--------------------|--------------------|--------------------|--------------------|
| Dexamethasone                                        | *                  | -                  | -                  | -                  | -                  | -                  | -                  | -                  | -                  | -                  | -                  |
| Dexamethasone/ Rituximab                             | -                  | -                  | -                  | -                  | -                  | 30                 | 30                 | 30                 | 30                 | -                  | -                  |
| Etoposide/ Ifosfamide/ Mitoxantrone/<br>Rituximab    | -                  | -                  | -                  | -                  | -                  | 1%                 | 1%                 | 1%                 | 1%                 | -                  | -                  |
| Fludarabine/ Lenalidomide/ Rituximab/<br>Thalidomide | 15                 | 15                 | -                  | -                  | -                  | -                  | -                  | -                  | -                  | -                  | -                  |
|                                                      | *                  | *                  | -                  | -                  | -                  | -                  | -                  | -                  | -                  | -                  | -                  |
| Fludarabine/ Treosulfan                              | 172                | 172                | 157                | 118                | -                  | -                  | -                  | -                  | -                  | -                  | -                  |
|                                                      | 4%                 | 4%                 | 3%                 | 2%                 | -                  | -                  | -                  | -                  | -                  | -                  | -                  |
| Gemcitabine/ Vinblastine                             | 93                 | 93                 | -                  | -                  | -                  | -                  | -                  | -                  | -                  | -                  | -                  |
|                                                      | 2%                 | 2%                 | -                  | -                  | -                  | -                  | -                  | -                  | -                  | -                  | -                  |
| L-Asparaginase/ Methotrexate                         | 33                 | 33                 | 33                 | 33                 | -                  | -                  | -                  | -                  | -                  | -                  | -                  |
|                                                      | 1%                 | 1%                 | 1%                 | 1%                 | -                  | -                  | -                  | -                  | -                  | -                  | -                  |
| Mercaptopurine                                       | -                  | 42                 | 42                 | 42                 | 42                 | -                  | -                  | -                  | -                  | -                  | -                  |
|                                                      | -                  | 1%                 | 1%                 | 1%                 | 1%                 | -                  | -                  | -                  | -                  | -                  | -                  |
| Mercaptopurine/ Prednis(ol)one                       | -                  | -                  | -                  | 8                  | 8                  | 8                  | 8                  | -                  | -                  | -                  | -                  |
|                                                      | -                  | -                  | -                  | *                  | *                  | *                  | *                  | -                  | -                  | -                  | -                  |
| Methylprednisolone                                   | 40                 | 40                 | 14                 | 14                 | -                  | -                  | -                  | -                  | -                  | -                  | -                  |
|                                                      | 1%                 | 1%                 | *                  | *                  | -                  | -                  | -                  | -                  | -                  | -                  | -                  |
| Rituximab/ Temsirolimus                              | -                  | -                  | 8                  | 8                  | 8                  | 8                  | -                  | -                  | -                  | -                  | -                  |
|                                                      | -                  | -                  | *                  | *                  | *                  | *                  | -                  | -                  | -                  | -                  | -                  |
| Temozolomide                                         | 31                 | -                  | -                  | -                  | -                  | -                  | -                  | -                  | -                  | -                  | -                  |
|                                                      | 1%                 | -                  | -                  | -                  | -                  | -                  | -                  | -                  | -                  | -                  | -                  |
| Trial Drug (Bio)                                     | -                  | -                  | -                  | -                  | -                  | -                  | 71                 | 87                 | 87                 | 87                 | 17                 |
|                                                      | -                  | -                  | -                  | -                  | -                  | -                  | 1%                 | 2%                 | 2%                 | 2%                 | *                  |



## **IntrinsiQ Background**

IntrinsiQ (<http://www.intrinsiq.com/>) (Division of AmerisourceBergen Specialty Group, Burlington, MA) is a research organization that seeks to improve the quality and understanding of cancer care through the use of the clinical software, IntelliDose®, that tracks and manages complex chemotherapy workflows across practices. The software implementations and knowledge gained are utilized to assist pharmaceutical companies improve their R&D process.

The data gathered via IntelliDose® is entered by 820 Medical, Pediatric, Gynecologic and Hematologic Oncologists who use the application in their practice. The composition of IntelliDose® users is much like the overall population of Oncologists who practice in the US with respect to specialty, size of practice, type of practice and geographic location.

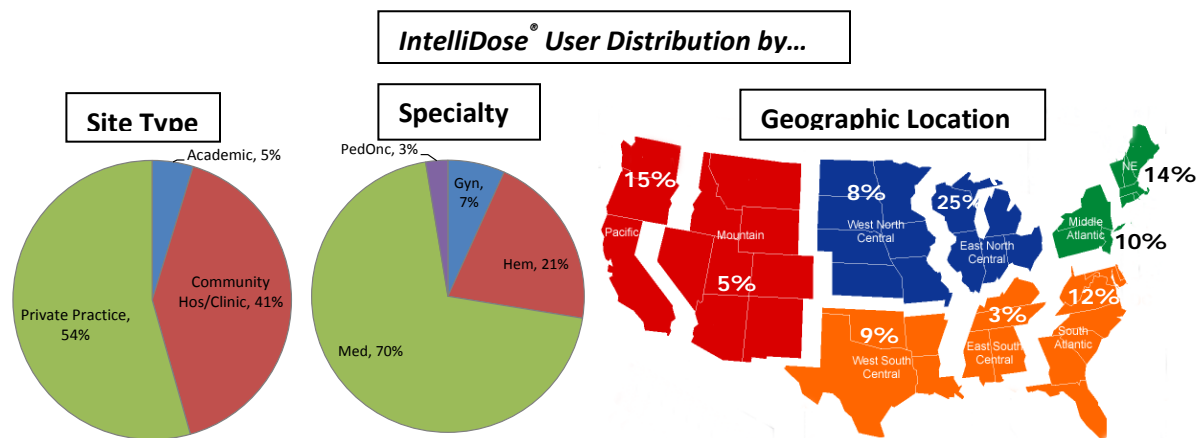

## **Gilead Project**

Gilead Sciences contracted IntrinsiQ to collect data from US to evaluate trend use of agents/regimens, including Rituximab, across lines of therapy in chronic lymphocytic leukemia during the years 2010 (starting in August), 2011, 2012 and through July 2013.

## **Methodology**

IntrinsiQ, in real time, at the time of care, collects and processes electronic *longitudinal* treatment records for 57,000 cancer patient treatments each year, which allows access to monthly updates of actual oncology data for epidemiology. The IntrinsiQ Data Warehouse contains information covering approximately 110,000 cancer patients and over 6.7 million administrations of drug therapy.

## **Data Interpretation**

The monthly actual use of regimens for the treatment of CLL in the US over a time period of 36 months (from August 2010 to July 2013) showed that single-agent rituximab is the second most common regimen (18% to 25% of monthly use) for the treatment of CLL across all lines of therapy, with bendamustine + rituximab being the most common regimen used (14% to 32% of monthly use). Rituximab monotherapy is also the second most commonly used regimen (7% to 16% of monthly use) for the treatment of relapsed CLL after the combination of bendamustine + rituximab (18% to 33% of monthly use).

**Diag Combo LOT Monthly  
(Maintenance Rituximab)**

diagnosis: leukemia  
chronic lymphocytic (CLL  
adult)

Line of Therapy: second  
line plus

|                                                                 | Aug-10 | Sep-10 | Oct-10 | Nov-10 | Dec-10 | Jan-11 | Feb-11 | Mar-11 | Apr-11 | May-11 | Jun-11 | Jul-11 | Aug-11 | Sep-11 | Oct-11 | Nov-11 | Dec-11 |
|-----------------------------------------------------------------|--------|--------|--------|--------|--------|--------|--------|--------|--------|--------|--------|--------|--------|--------|--------|--------|--------|
| <b>IntelliDose Patients</b>                                     | 130    | 124    | 128    | 131    | 111    | 117    | 109    | 118    | 129    | 134    | 157    | 154    | 156    | 153    | 173    | 156    | 177    |
| <b>Projected Patients</b>                                       | 3493   | 3278   | 3338   | 3322   | 2781   | 2877   | 2804   | 2896   | 3249   | 3259   | 3728   | 3718   | 3737   | 3638   | 4021   | 3471   | 4077   |
| <b>bendamustine - rituximab</b>                                 | 724    | 766    | 780    | 683    | 653    | 517    | 671    | 640    | 810    | 805    | 809    | 844    | 1056   | 1047   | 955    | 758    | 943    |
|                                                                 | 20.7%  | 23.4%  | 23.4%  | 20.6%  | 23.5%  | 18.0%  | 23.9%  | 22.1%  | 24.9%  | 24.7%  | 21.7%  | 22.7%  | 28.3%  | 28.8%  | 23.8%  | 21.8%  | 23.1%  |
| <b>rituximab</b>                                                | 456    | 343    | 338    | 380    | 201    | 221    | 310    | 394    | 455    | 439    | 476    | 458    | 456    | 381    | 652    | 535    | 506    |
|                                                                 | 13.0%  | 10.5%  | 10.1%  | 11.4%  | 7.2%   | 7.7%   | 11.0%  | 13.6%  | 14.0%  | 13.5%  | 12.8%  | 12.3%  | 12.2%  | 10.5%  | 16.2%  | 15.4%  | 12.4%  |
| <b>bendamustine</b>                                             | 241    | 370    | 364    | 202    | 226    | 369    | 413    | 246    | 354    | 268    | 333    | 241    | 216    | 190    | 140    | 67     | 92     |
|                                                                 | 6.9%   | 11.3%  | 10.9%  | 6.1%   | 8.1%   | 12.8%  | 14.7%  | 8.5%   | 10.9%  | 8.2%   | 8.9%   | 6.5%   | 5.8%   | 5.2%   | 3.5%   | 1.9%   | 2.3%   |
| <b>chlorambucil</b>                                             | 358    | 294    | 350    | 309    | 346    | 342    | 326    | 337    | 314    | 363    | 374    | 398    | 367    | 373    | 326    | 323    | 371    |
|                                                                 | 10.2%  | 9.0%   | 10.5%  | 9.3%   | 12.5%  | 11.9%  | 11.6%  | 11.6%  | 9.7%   | 11.1%  | 10.0%  | 10.7%  | 9.8%   | 10.2%  | 8.1%   | 9.3%   | 9.1%   |
| <b>cyclophosphamide - fludarabine - rituximab</b>               | 295    | 264    | 286    | 481    | 377    | 344    | 232    | 271    | 304    | 195    | 262    | 362    | 384    | 238    | 326    | 290    | 253    |
|                                                                 | 8.4%   | 8.1%   | 8.6%   | 14.5%  | 13.5%  | 12.0%  | 8.3%   | 9.3%   | 9.3%   | 6.0%   | 7.0%   | 9.7%   | 10.3%  | 6.5%   | 8.1%   | 8.4%   | 6.2%   |
| <b>lenalidomide</b>                                             | 0      | 54     | 76     | 54     | 0      | 0      | 0      | 0      | 0      | 164    | 331    | 379    | 370    | 361    | 364    | 360    | 555    |
|                                                                 | 0.0%   | 1.6%   | 2.3%   | 1.6%   | 0.0%   | 0.0%   | 0.0%   | 0.0%   | 0.0%   | 5.0%   | 8.9%   | 10.2%  | 9.9%   | 9.9%   | 9.0%   | 10.4%  | 13.6%  |
| <b>ofatumumab</b>                                               | 134    | 158    | 182    | 127    | 50     | 49     | 52     | 25     | 25     | 49     | 24     | 48     | 24     | 24     | 70     | 89     | 92     |
|                                                                 | 3.8%   | 4.8%   | 5.5%   | 3.8%   | 1.8%   | 1.7%   | 1.8%   | 0.8%   | 0.8%   | 1.5%   | 0.6%   | 1.3%   | 0.6%   | 0.7%   | 1.7%   | 2.6%   | 2.3%   |
| <b>fludarabine</b>                                              | 188    | 185    | 156    | 101    | 50     | 74     | 52     | 123    | 101    | 146    | 119    | 145    | 144    | 190    | 163    | 89     | 161    |
|                                                                 | 5.4%   | 5.6%   | 4.7%   | 3.0%   | 1.8%   | 2.6%   | 1.8%   | 4.2%   | 3.1%   | 4.5%   | 3.2%   | 3.9%   | 3.9%   | 5.2%   | 4.1%   | 2.6%   | 3.9%   |
| <b>fludarabine - rituximab</b>                                  | 295    | 264    | 104    | 177    | 151    | 148    | 155    | 148    | 152    | 122    | 167    | 121    | 96     | 71     | 210    | 156    | 207    |
|                                                                 | 8.4%   | 8.1%   | 3.1%   | 5.3%   | 5.4%   | 5.1%   | 5.5%   | 5.1%   | 4.7%   | 3.7%   | 4.5%   | 3.2%   | 2.6%   | 2.0%   | 5.2%   | 4.5%   | 5.1%   |
| <b>cyclophosphamide - rituximab - vincristine</b>               | 54     | 106    | 104    | 127    | 176    | 74     | 52     | 25     | 76     | 49     | 48     | 24     | 72     | 71     | 47     | 67     | 69     |
|                                                                 | 1.5%   | 3.2%   | 3.1%   | 3.8%   | 6.3%   | 2.6%   | 1.8%   | 0.8%   | 2.3%   | 1.5%   | 1.3%   | 0.6%   | 1.9%   | 2.0%   | 1.2%   | 1.9%   | 1.7%   |
| <b>cyclophosphamide - doxorubicin - rituximab - vincristine</b> | 27     | 0      | 26     | 51     | 50     | 49     | 26     | 49     | 101    | 49     | 71     | 72     | 48     | 71     | 47     | 89     | 115    |
|                                                                 | 0.8%   | 0.0%   | 0.8%   | 1.5%   | 1.8%   | 1.7%   | 0.9%   | 1.7%   | 3.1%   | 1.5%   | 1.9%   | 1.9%   | 1.3%   | 2.0%   | 1.2%   | 2.6%   | 2.8%   |
| <b>investigational drugs</b>                                    | 27     | 0      | 26     | 0      | 0      | 25     | 0      | 0      | 25     | 0      | 0      | 24     | 0      | 24     | 0      | 22     | 0      |
|                                                                 | 0.8%   | 0.0%   | 0.8%   | 0.0%   | 0.0%   | 0.9%   | 0.0%   | 0.0%   | 0.8%   | 0.0%   | 0.0%   | 0.6%   | 0.0%   | 0.7%   | 0.0%   | 0.6%   | 0.0%   |
| <b>azacitidine</b>                                              | 0      | 0      | 0      | 0      | 0      | 0      | 0      | 0      | 0      | 0      | 0      | 0      | 48     | 48     | 47     | 67     | 46     |
|                                                                 | 0.0%   | 0.0%   | 0.0%   | 0.0%   | 0.0%   | 0.0%   | 0.0%   | 0.0%   | 0.0%   | 0.0%   | 0.0%   | 0.0%   | 1.3%   | 1.3%   | 1.2%   | 1.9%   | 1.1%   |
| <b>carboplatin - paclitaxel</b>                                 | 0      | 0      | 26     | 51     | 25     | 25     | 26     | 0      | 0      | 0      | 0      | 0      | 0      | 0      | 0      | 0      | 0      |
|                                                                 | 0.0%   | 0.0%   | 0.8%   | 1.5%   | 0.9%   | 0.9%   | 0.9%   | 0.0%   | 0.0%   | 0.0%   | 0.0%   | 0.0%   | 0.0%   | 0.0%   | 0.0%   | 0.0%   | 0.0%   |
| <b>cyclophosphamide - vincristine</b>                           | 80     | 0      | 26     | 51     | 50     | 74     | 52     | 49     | 25     | 0      | 95     | 72     | 48     | 24     | 0      | 0      | 0      |
|                                                                 | 2.3%   | 0.0%   | 0.8%   | 1.5%   | 1.8%   | 2.6%   | 1.8%   | 1.7%   | 0.8%   | 0.0%   | 2.6%   | 1.9%   | 1.3%   | 0.7%   | 0.0%   | 0.0%   | 0.0%   |
| <b>cyclophosphamide - fludarabine</b>                           | 27     | 26     | 26     | 25     | 0      | 98     | 103    | 49     | 76     | 98     | 71     | 24     | 24     | 48     | 117    | 112    | 69     |
|                                                                 | 0.8%   | 0.8%   | 0.8%   | 0.8%   | 0.0%   | 3.4%   | 3.7%   | 1.7%   | 2.3%   | 3.0%   | 1.9%   | 0.6%   | 0.6%   | 1.3%   | 2.9%   | 3.2%   | 1.7%   |
| <b>alemtuzumab</b>                                              | 80     | 53     | 52     | 127    | 75     | 123    | 77     | 98     | 101    | 73     | 95     | 72     | 48     | 24     | 23     | 0      | 0      |
|                                                                 | 2.3%   | 1.6%   | 1.6%   | 3.8%   | 2.7%   | 4.3%   | 2.8%   | 3.4%   | 3.1%   | 2.2%   | 2.6%   | 1.9%   | 1.3%   | 0.7%   | 0.6%   | 0.0%   | 0.0%   |
| <b>cyclophosphamide - rituximab</b>                             | 107    | 79     | 52     | 51     | 25     | 25     | 26     | 98     | 76     | 98     | 95     | 121    | 48     | 71     | 23     | 112    | 69     |
|                                                                 | 3.1%   | 2.4%   | 1.6%   | 1.5%   | 0.9%   | 0.9%   | 0.9%   | 3.4%   | 2.3%   | 3.0%   | 2.6%   | 3.2%   | 1.3%   | 2.0%   | 0.6%   | 3.2%   | 1.7%   |
| <b>chlorambucil - rituximab</b>                                 | 27     | 53     | 52     | 51     | 0      | 0      | 0      | 0      | 0      | 0      | 24     | 24     | 24     | 24     | 23     | 0      | 0      |
|                                                                 | 0.8%   | 1.6%   | 1.6%   | 1.5%   | 0.0%   | 0.0%   | 0.0%   | 0.0%   | 0.0%   | 0.0%   | 0.6%   | 0.6%   | 0.6%   | 0.7%   | 0.6%   | 0.0%   | 0.0%   |

|                                                                             | Aug-10 | Sep-10 | Oct-10 | Nov-10 | Dec-10 | Jan-11 | Feb-11 | Mar-11 | Apr-11 | May-11 | Jun-11 | Jul-11 | Aug-11 | Sep-11 | Oct-11 | Nov-11 | Dec-11 |
|-----------------------------------------------------------------------------|--------|--------|--------|--------|--------|--------|--------|--------|--------|--------|--------|--------|--------|--------|--------|--------|--------|
| <b>IntelliDose Patients</b>                                                 | 130    | 124    | 128    | 131    | 111    | 117    | 109    | 118    | 129    | 134    | 157    | 154    | 156    | 153    | 173    | 156    | 177    |
| <b>Projected Patients</b>                                                   | 3493   | 3278   | 3338   | 3322   | 2781   | 2877   | 2804   | 2896   | 3249   | 3259   | 3728   | 3718   | 3737   | 3638   | 4021   | 3471   | 4077   |
| <b>cyclophosphamide</b>                                                     | 0      | 0      | 26     | 0      | 25     | 49     | 26     | 25     | 0      | 0      | 24     | 24     | 0      | 24     | 23     | 22     | 23     |
|                                                                             | 0.0%   | 0.0%   | 0.8%   | 0.0%   | 0.9%   | 1.7%   | 0.9%   | 0.8%   | 0.0%   | 0.0%   | 0.6%   | 0.6%   | 0.0%   | 0.7%   | 0.6%   | 0.6%   | 0.6%   |
| <b>cyclophosphamide - doxorubicin - vincristine</b>                         | 27     | 26     | 0      | 0      | 0      | 0      | 0      | 25     | 0      | 24     | 24     | 24     | 24     | 24     | 23     | 22     | 46     |
|                                                                             | 0.8%   | 0.8%   | 0.0%   | 0.0%   | 0.0%   | 0.0%   | 0.0%   | 0.8%   | 0.0%   | 0.7%   | 0.6%   | 0.6%   | 0.6%   | 0.7%   | 0.6%   | 0.6%   | 1.1%   |
| <b>alemtuzumab - rituximab</b>                                              | 0      | 0      | 0      | 0      | 0      | 0      | 0      | 0      | 0      | 24     | 24     | 24     | 24     | 0      | 0      | 0      | 23     |
|                                                                             | 0.0%   | 0.0%   | 0.0%   | 0.0%   | 0.0%   | 0.0%   | 0.0%   | 0.0%   | 0.0%   | 0.7%   | 0.6%   | 0.6%   | 0.6%   | 0.0%   | 0.0%   | 0.0%   | 0.6%   |
| <b>brentuximab vedotin</b>                                                  | 0      | 0      | 0      | 0      | 0      | 0      | 0      | 0      | 0      | 0      | 0      | 0      | 0      | 0      | 0      | 0      | 23     |
|                                                                             | 0.0%   | 0.0%   | 0.0%   | 0.0%   | 0.0%   | 0.0%   | 0.0%   | 0.0%   | 0.0%   | 0.0%   | 0.0%   | 0.0%   | 0.0%   | 0.0%   | 0.0%   | 0.0%   | 0.6%   |
| <b>decitabine</b>                                                           | 0      | 0      | 0      | 0      | 0      | 0      | 0      | 0      | 0      | 0      | 0      | 0      | 0      | 0      | 0      | 0      | 23     |
|                                                                             | 0.0%   | 0.0%   | 0.0%   | 0.0%   | 0.0%   | 0.0%   | 0.0%   | 0.0%   | 0.0%   | 0.0%   | 0.0%   | 0.0%   | 0.0%   | 0.0%   | 0.0%   | 0.0%   | 0.6%   |
| <b>carboplatin - etoposide - ifosfamide - rituximab</b>                     | 0      | 0      | 52     | 0      | 0      | 25     | 0      | 0      | 0      | 0      | 0      | 0      | 0      | 0      | 23     | 0      | 0      |
|                                                                             | 0.0%   | 0.0%   | 1.6%   | 0.0%   | 0.0%   | 0.9%   | 0.0%   | 0.0%   | 0.0%   | 0.0%   | 0.0%   | 0.0%   | 0.0%   | 0.0%   | 0.6%   | 0.0%   | 0.0%   |
| <b>cyclophosphamide - mitoxantrone - rituximab - vincristine</b>            | 0      | 0      | 0      | 25     | 50     | 25     | 0      | 0      | 0      | 0      | 0      | 0      | 0      | 0      | 0      | 0      | 0      |
|                                                                             | 0.0%   | 0.0%   | 0.0%   | 0.8%   | 1.8%   | 0.9%   | 0.0%   | 0.0%   | 0.0%   | 0.0%   | 0.0%   | 0.0%   | 0.0%   | 0.0%   | 0.0%   | 0.0%   | 0.0%   |
| <b>cisplatin</b>                                                            | 0      | 0      | 0      | 0      | 0      | 0      | 0      | 0      | 0      | 0      | 0      | 24     | 24     | 0      | 0      | 0      | 0      |
|                                                                             | 0.0%   | 0.0%   | 0.0%   | 0.0%   | 0.0%   | 0.0%   | 0.0%   | 0.0%   | 0.0%   | 0.0%   | 0.0%   | 0.6%   | 0.6%   | 0.0%   | 0.0%   | 0.0%   | 0.0%   |
| <b>cyclophosphamide - pentostatin - rituximab</b>                           | 54     | 26     | 52     | 0      | 25     | 25     | 26     | 74     | 51     | 24     | 24     | 48     | 72     | 71     | 117    | 112    | 46     |
|                                                                             | 1.5%   | 0.8%   | 1.6%   | 0.0%   | 0.9%   | 0.9%   | 0.9%   | 2.5%   | 1.6%   | 0.7%   | 0.6%   | 1.3%   | 1.9%   | 2.0%   | 2.9%   | 3.2%   | 1.1%   |
| <b>dasatinib</b>                                                            | 0      | 0      | 0      | 25     | 25     | 25     | 26     | 25     | 25     | 24     | 24     | 24     | 24     | 24     | 23     | 22     | 23     |
|                                                                             | 0.0%   | 0.0%   | 0.0%   | 0.8%   | 0.9%   | 0.9%   | 0.9%   | 0.9%   | 0.8%   | 0.7%   | 0.6%   | 0.6%   | 0.6%   | 0.7%   | 0.6%   | 0.6%   | 0.6%   |
| <b>bortezomib</b>                                                           | 54     | 26     | 0      | 51     | 25     | 25     | 26     | 0      | 25     | 24     | 24     | 0      | 0      | 0      | 0      | 0      | 0      |
|                                                                             | 1.5%   | 0.8%   | 0.0%   | 1.5%   | 0.9%   | 0.9%   | 0.9%   | 0.0%   | 0.8%   | 0.7%   | 0.6%   | 0.0%   | 0.0%   | 0.0%   | 0.0%   | 0.0%   | 0.0%   |
| <b>nilotinib</b>                                                            | 0      | 26     | 26     | 25     | 25     | 25     | 26     | 25     | 0      | 0      | 0      | 0      | 0      | 0      | 0      | 0      | 23     |
|                                                                             | 0.0%   | 0.8%   | 0.8%   | 0.8%   | 0.9%   | 0.9%   | 0.9%   | 0.9%   | 0.0%   | 0.0%   | 0.0%   | 0.0%   | 0.0%   | 0.0%   | 0.0%   | 0.0%   | 0.6%   |
| <b>cyclophosphamide - doxorubicin - etoposide - rituximab - vincristine</b> | 0      | 0      | 0      | 25     | 25     | 0      | 0      | 49     | 51     | 49     | 24     | 0      | 0      | 24     | 23     | 22     | 0      |
|                                                                             | 0.0%   | 0.0%   | 0.0%   | 0.8%   | 0.9%   | 0.0%   | 0.0%   | 1.7%   | 1.6%   | 1.5%   | 0.6%   | 0.0%   | 0.0%   | 0.7%   | 0.6%   | 0.6%   | 0.0%   |
| <b>bleomycin - dacarbazine - doxorubicin - vinblastine</b>                  | 54     | 26     | 0      | 0      | 0      | 0      | 0      | 0      | 0      | 24     | 24     | 24     | 24     | 24     | 23     | 0      | 0      |
|                                                                             | 1.5%   | 0.8%   | 0.0%   | 0.0%   | 0.0%   | 0.0%   | 0.0%   | 0.0%   | 0.0%   | 0.7%   | 0.6%   | 0.6%   | 0.6%   | 0.7%   | 0.6%   | 0.0%   | 0.0%   |
| <b>fludarabine - mitoxantrone</b>                                           | 0      | 0      | 0      | 0      | 0      | 0      | 0      | 0      | 0      | 0      | 0      | 24     | 24     | 24     | 47     | 45     | 46     |
|                                                                             | 0.0%   | 0.0%   | 0.0%   | 0.0%   | 0.0%   | 0.0%   | 0.0%   | 0.0%   | 0.0%   | 0.0%   | 0.0%   | 0.6%   | 0.6%   | 0.7%   | 1.2%   | 1.3%   | 1.1%   |
| <b>bendamustine - mitoxantrone - rituximab</b>                              | 0      | 26     | 26     | 0      | 0      | 0      | 0      | 0      | 0      | 0      | 0      | 0      | 0      | 24     | 47     | 0      | 23     |
|                                                                             | 0.0%   | 0.8%   | 0.8%   | 0.0%   | 0.0%   | 0.0%   | 0.0%   | 0.0%   | 0.0%   | 0.0%   | 0.0%   | 0.0%   | 0.0%   | 0.7%   | 1.2%   | 0.0%   | 0.6%   |
| <b>gemcitabine - paclitaxel</b>                                             | 0      | 0      | 0      | 0      | 0      | 0      | 0      | 0      | 0      | 24     | 24     | 24     | 24     | 24     | 23     | 22     | 23     |
|                                                                             | 0.0%   | 0.0%   | 0.0%   | 0.0%   | 0.0%   | 0.0%   | 0.0%   | 0.0%   | 0.0%   | 0.7%   | 0.6%   | 0.6%   | 0.6%   | 0.7%   | 0.6%   | 0.6%   | 0.6%   |
| <b>pemetrexed</b>                                                           | 0      | 0      | 0      | 0      | 0      | 0      | 0      | 0      | 0      | 0      | 0      | 0      | 0      | 24     | 23     | 22     | 23     |
|                                                                             | 0.0%   | 0.0%   | 0.0%   | 0.0%   | 0.0%   | 0.0%   | 0.0%   | 0.0%   | 0.0%   | 0.0%   | 0.0%   | 0.0%   | 0.0%   | 0.7%   | 0.6%   | 0.6%   | 0.6%   |
| <b>carboplatin - etoposide</b>                                              | 0      | 0      | 26     | 25     | 25     | 49     | 26     | 25     | 0      | 0      | 0      | 0      | 0      | 0      | 0      | 0      | 0      |
|                                                                             | 0.0%   | 0.0%   | 0.8%   | 0.8%   | 0.9%   | 1.7%   | 0.9%   | 0.8%   | 0.0%   | 0.0%   | 0.0%   | 0.0%   | 0.0%   | 0.0%   | 0.0%   | 0.0%   | 0.0%   |
| <b>hydroxyurea - rituximab</b>                                              | 0      | 0      | 26     | 25     | 25     | 25     | 26     | 25     | 0      | 24     | 0      | 0      | 0      | 0      | 0      | 0      | 0      |
|                                                                             | 0.0%   | 0.0%   | 0.8%   | 0.8%   | 0.9%   | 0.9%   | 0.9%   | 0.8%   | 0.0%   | 0.7%   | 0.0%   | 0.0%   | 0.0%   | 0.0%   | 0.0%   | 0.0%   | 0.0%   |
| <b>cyclophosphamide - doxorubicin - rituximab</b>                           | 27     | 26     | 26     | 25     | 0      | 0      | 0      | 0      | 0      | 0      | 0      | 0      | 0      | 0      | 0      | 0      | 0      |
|                                                                             | 0.8%   | 0.8%   | 0.8%   | 0.8%   | 0.0%   | 0.0%   | 0.0%   | 0.0%   | 0.0%   | 0.0%   | 0.0%   | 0.0%   | 0.0%   | 0.0%   | 0.0%   | 0.0%   | 0.0%   |
| <b>pentostatin</b>                                                          | 0      | 0      | 0      | 0      | 0      | 0      | 0      | 0      | 0      | 0      | 0      | 0      | 0      | 0      | 23     | 22     | 23     |
|                                                                             | 0.0%   | 0.0%   | 0.0%   | 0.0%   | 0.0%   | 0.0%   | 0.0%   | 0.0%   | 0.0%   | 0.0%   | 0.0%   | 0.0%   | 0.0%   | 0.0%   | 0.6%   | 0.6%   | 0.6%   |





**Diag Combo LOT Monthly  
(Maintenance Rituximab)**

diagnosis: leukemia  
chronic lymphocytic (CLL  
adult)

Line of Therapy: second  
line plus

|                                                                 | Jan-12 | Feb-12 | Mar-12 | Apr-12 | May-12 | Jun-12 | Jul-12 | Aug-12 | Sep-12 | Oct-12 | Nov-12 | Dec-12 | Jan-13 | Feb-13 | Mar-13 | Apr-13 | May-13 | Jun-13 | Jul-13 |
|-----------------------------------------------------------------|--------|--------|--------|--------|--------|--------|--------|--------|--------|--------|--------|--------|--------|--------|--------|--------|--------|--------|--------|
| <b>IntelliDose Patients</b>                                     | 185    | 190    | 184    | 160    | 166    | 153    | 127    | 153    | 139    | 128    | 136    | 135    | 163    | 145    | 148    | 136    | 156    | 138    | 162    |
| <b>Projected Patients</b>                                       | 4055   | 4388   | 4275   | 3925   | 4028   | 3709   | 3178   | 3950   | 3779   | 3247   | 3316   | 3329   | 4081   | 3747   | 3855   | 3425   | 3761   | 3529   | 3947   |
| <b>bendamustine - rituximab</b>                                 | 723    | 1063   | 951    | 959    | 1016   | 923    | 625    | 958    | 874    | 813    | 826    | 889    | 1175   | 1084   | 1253   | 879    | 988    | 969    | 927    |
|                                                                 | 17.8%  | 24.2%  | 22.2%  | 24.4%  | 25.2%  | 24.9%  | 19.7%  | 24.3%  | 23.1%  | 25.0%  | 24.9%  | 26.7%  | 28.8%  | 28.9%  | 32.5%  | 25.7%  | 26.3%  | 27.5%  | 23.5%  |
| <b>rituximab</b>                                                | 350    | 508    | 557    | 467    | 557    | 510    | 350    | 544    | 491    | 406    | 365    | 445    | 525    | 361    | 496    | 427    | 410    | 485    | 561    |
|                                                                 | 8.6%   | 11.6%  | 13.0%  | 11.9%  | 13.8%  | 13.8%  | 11.0%  | 13.8%  | 13.0%  | 12.5%  | 11.0%  | 13.4%  | 12.9%  | 9.6%   | 12.9%  | 12.5%  | 10.9%  | 13.7%  | 14.2%  |
| <b>bendamustine</b>                                             | 197    | 208    | 255    | 246    | 290    | 243    | 175    | 181    | 300    | 152    | 243    | 222    | 350    | 361    | 209    | 351    | 289    | 306    | 342    |
|                                                                 | 4.9%   | 4.7%   | 6.0%   | 6.3%   | 7.2%   | 6.6%   | 5.5%   | 4.6%   | 7.9%   | 4.7%   | 7.3%   | 6.7%   | 8.6%   | 9.6%   | 5.4%   | 10.3%  | 7.7%   | 8.7%   | 8.7%   |
| <b>chlorambucil</b>                                             | 358    | 370    | 409    | 459    | 475    | 428    | 437    | 457    | 423    | 403    | 417    | 358    | 431    | 447    | 443    | 418    | 362    | 327    | 291    |
|                                                                 | 8.8%   | 8.4%   | 9.6%   | 11.7%  | 11.8%  | 11.5%  | 13.8%  | 11.6%  | 11.2%  | 12.4%  | 12.6%  | 10.8%  | 10.6%  | 11.9%  | 11.5%  | 12.2%  | 9.6%   | 9.3%   | 7.4%   |
| <b>cyclophosphamide - fludarabine - rituximab</b>               | 329    | 347    | 325    | 221    | 315    | 267    | 275    | 259    | 246    | 203    | 292    | 272    | 175    | 77     | 235    | 151    | 241    | 204    | 268    |
|                                                                 | 8.1%   | 7.9%   | 7.6%   | 5.6%   | 7.8%   | 7.2%   | 8.7%   | 6.6%   | 6.5%   | 6.3%   | 8.8%   | 8.2%   | 4.3%   | 2.1%   | 6.1%   | 4.4%   | 6.4%   | 5.8%   | 6.8%   |
| <b>lenalidomide</b>                                             | 565    | 530    | 503    | 317    | 311    | 317    | 291    | 255    | 217    | 204    | 203    | 80     | 75     | 75     | 72     | 95     | 194    | 167    | 191    |
|                                                                 | 13.9%  | 12.1%  | 11.8%  | 8.1%   | 7.7%   | 8.5%   | 9.2%   | 6.5%   | 5.7%   | 6.3%   | 6.1%   | 2.4%   | 1.8%   | 2.0%   | 1.9%   | 2.8%   | 5.2%   | 4.7%   | 4.8%   |
| <b>ofatumumab</b>                                               | 66     | 69     | 139    | 123    | 145    | 146    | 150    | 155    | 164    | 152    | 122    | 49     | 150    | 103    | 104    | 25     | 72     | 77     | 171    |
|                                                                 | 1.6%   | 1.6%   | 3.3%   | 3.1%   | 3.6%   | 3.9%   | 4.7%   | 3.9%   | 4.3%   | 4.7%   | 3.7%   | 1.5%   | 3.7%   | 2.8%   | 2.7%   | 0.7%   | 1.9%   | 2.2%   | 4.3%   |
| <b>fludarabine</b>                                              | 66     | 92     | 70     | 74     | 73     | 97     | 50     | 26     | 27     | 0      | 24     | 49     | 75     | 103    | 52     | 126    | 121    | 77     | 146    |
|                                                                 | 1.6%   | 2.1%   | 1.6%   | 1.9%   | 1.8%   | 2.6%   | 1.6%   | 0.7%   | 0.7%   | 0.0%   | 0.7%   | 1.5%   | 1.8%   | 2.8%   | 1.4%   | 3.7%   | 3.2%   | 2.2%   | 3.7%   |
| <b>fludarabine - rituximab</b>                                  | 219    | 116    | 70     | 25     | 48     | 73     | 150    | 207    | 191    | 102    | 97     | 99     | 50     | 77     | 78     | 100    | 121    | 102    | 122    |
|                                                                 | 5.4%   | 2.6%   | 1.6%   | 0.6%   | 1.2%   | 2.0%   | 4.7%   | 5.2%   | 5.1%   | 3.1%   | 2.9%   | 3.0%   | 1.2%   | 2.1%   | 2.0%   | 2.9%   | 3.2%   | 2.9%   | 3.1%   |
| <b>cyclophosphamide - rituximab - vincristine</b>               | 131    | 139    | 139    | 172    | 194    | 122    | 75     | 52     | 82     | 102    | 97     | 74     | 75     | 129    | 104    | 126    | 145    | 77     | 122    |
|                                                                 | 3.2%   | 3.2%   | 3.3%   | 4.4%   | 4.8%   | 3.3%   | 2.4%   | 1.3%   | 2.2%   | 3.1%   | 2.9%   | 2.2%   | 1.8%   | 3.4%   | 2.7%   | 3.7%   | 3.8%   | 2.2%   | 3.1%   |
| <b>cyclophosphamide - doxorubicin - rituximab - vincristine</b> | 153    | 162    | 139    | 148    | 97     | 97     | 25     | 78     | 82     | 0      | 49     | 25     | 25     | 26     | 78     | 25     | 24     | 26     | 98     |
|                                                                 | 3.8%   | 3.7%   | 3.3%   | 3.8%   | 2.4%   | 2.6%   | 0.8%   | 2.0%   | 2.2%   | 0.0%   | 1.5%   | 0.7%   | 0.6%   | 0.7%   | 2.0%   | 0.7%   | 0.6%   | 0.7%   | 2.5%   |
| <b>investigational drugs</b>                                    | 0      | 0      | 0      | 49     | 24     | 49     | 0      | 78     | 82     | 127    | 73     | 124    | 150    | 103    | 131    | 126    | 96     | 77     | 73     |
|                                                                 | 0.0%   | 0.0%   | 0.0%   | 1.3%   | 0.6%   | 1.3%   | 0.0%   | 2.0%   | 2.2%   | 3.9%   | 2.2%   | 3.7%   | 3.7%   | 2.8%   | 3.4%   | 3.7%   | 2.6%   | 2.2%   | 1.9%   |
| <b>azacitidine</b>                                              | 44     | 23     | 23     | 25     | 0      | 0      | 50     | 52     | 55     | 51     | 49     | 49     | 25     | 52     | 26     | 75     | 72     | 51     | 73     |
|                                                                 | 1.1%   | 0.5%   | 0.5%   | 0.6%   | 0.0%   | 0.0%   | 1.6%   | 1.3%   | 1.4%   | 1.6%   | 1.5%   | 1.5%   | 0.6%   | 1.4%   | 0.7%   | 2.2%   | 1.9%   | 1.4%   | 1.9%   |
| <b>carboplatin - paclitaxel</b>                                 | 0      | 0      | 0      | 0      | 0      | 0      | 50     | 26     | 0      | 0      | 0      | 0      | 25     | 26     | 52     | 25     | 24     | 0      | 73     |
|                                                                 | 0.0%   | 0.0%   | 0.0%   | 0.0%   | 0.0%   | 0.0%   | 1.6%   | 0.7%   | 0.0%   | 0.0%   | 0.0%   | 0.0%   | 0.6%   | 0.7%   | 1.4%   | 0.7%   | 0.6%   | 0.0%   | 1.9%   |
| <b>cyclophosphamide - vincristine</b>                           | 44     | 69     | 93     | 49     | 24     | 24     | 25     | 78     | 27     | 25     | 49     | 0      | 25     | 77     | 26     | 50     | 96     | 77     | 49     |
|                                                                 | 1.1%   | 1.6%   | 2.2%   | 1.3%   | 0.6%   | 0.7%   | 0.8%   | 2.0%   | 0.7%   | 0.8%   | 1.5%   | 0.0%   | 0.6%   | 2.1%   | 0.7%   | 1.5%   | 2.6%   | 2.2%   | 1.2%   |
| <b>cyclophosphamide - fludarabine</b>                           | 44     | 23     | 23     | 74     | 48     | 24     | 0      | 0      | 0      | 0      | 0      | 25     | 50     | 26     | 26     | 25     | 48     | 26     | 49     |
|                                                                 | 1.1%   | 0.5%   | 0.5%   | 1.9%   | 1.2%   | 0.7%   | 0.0%   | 0.0%   | 0.0%   | 0.0%   | 0.0%   | 0.7%   | 1.2%   | 0.7%   | 0.7%   | 0.7%   | 1.3%   | 0.7%   | 1.2%   |
| <b>alemtuzumab</b>                                              | 44     | 116    | 116    | 98     | 48     | 49     | 25     | 26     | 0      | 51     | 73     | 49     | 100    | 103    | 52     | 25     | 72     | 77     | 24     |
|                                                                 | 1.1%   | 2.6%   | 2.7%   | 2.5%   | 1.2%   | 1.3%   | 0.8%   | 0.7%   | 0.0%   | 1.6%   | 2.2%   | 1.5%   | 2.5%   | 2.8%   | 1.4%   | 0.7%   | 1.9%   | 2.2%   | 0.6%   |
| <b>cyclophosphamide - rituximab</b>                             | 88     | 46     | 46     | 49     | 24     | 49     | 75     | 52     | 27     | 25     | 0      | 49     | 25     | 103    | 104    | 75     | 24     | 26     | 24     |
|                                                                 | 2.2%   | 1.1%   | 1.1%   | 1.3%   | 0.6%   | 1.3%   | 2.4%   | 1.3%   | 0.7%   | 0.8%   | 0.0%   | 1.5%   | 0.6%   | 2.8%   | 2.7%   | 2.2%   | 0.6%   | 0.7%   | 0.6%   |
| <b>chlorambucil - rituximab</b>                                 | 0      | 0      | 0      | 0      | 0      | 0      | 0      | 0      | 55     | 76     | 73     | 49     | 50     | 52     | 26     | 0      | 24     | 26     | 24     |
|                                                                 | 0.0%   | 0.0%   | 0.0%   | 0.0%   | 0.0%   | 0.0%   | 0.0%   | 0.0%   | 1.4%   | 2.3%   | 2.2%   | 1.5%   | 1.2%   | 1.4%   | 0.7%   | 0.0%   | 0.6%   | 0.7%   | 0.6%   |



|                                                                  | Jan-12 | Feb-12 | Mar-12 | Apr-12 | May-12 | Jun-12 | Jul-12 | Aug-12 | Sep-12 | Oct-12 | Nov-12 | Dec-12 | Jan-13 | Feb-13 | Mar-13 | Apr-13 | May-13 | Jun-13 | Jul-13 |
|------------------------------------------------------------------|--------|--------|--------|--------|--------|--------|--------|--------|--------|--------|--------|--------|--------|--------|--------|--------|--------|--------|--------|
| <b>IntelliDose Patients</b>                                      | 185    | 190    | 184    | 160    | 166    | 153    | 127    | 153    | 139    | 128    | 136    | 135    | 163    | 145    | 148    | 136    | 156    | 138    | 162    |
| <b>Projected Patients</b>                                        | 4055   | 4388   | 4275   | 3925   | 4028   | 3709   | 3178   | 3950   | 3779   | 3247   | 3316   | 3329   | 4081   | 3747   | 3855   | 3425   | 3761   | 3529   | 3947   |
|                                                                  | Jan-12 | Feb-12 | Mar-12 | Apr-12 | May-12 | Jun-12 | Jul-12 | Aug-12 | Sep-12 | Oct-12 | Nov-12 | Dec-12 | Jan-13 | Feb-13 | Mar-13 | Apr-13 | May-13 | Jun-13 | Jul-13 |
| <b>gemcitabine - paclitaxel</b>                                  | 22     | 23     | 0      | 0      | 0      | 0      | 0      | 0      | 0      | 0      | 0      | 0      | 0      | 0      | 0      | 0      | 0      | 0      | 0      |
|                                                                  | 0.5%   | 0.5%   | 0.0%   | 0.0%   | 0.0%   | 0.0%   | 0.0%   | 0.0%   | 0.0%   | 0.0%   | 0.0%   | 0.0%   | 0.0%   | 0.0%   | 0.0%   | 0.0%   | 0.0%   | 0.0%   | 0.0%   |
| <b>pralatrexate</b>                                              | 0      | 0      | 0      | 0      | 0      | 0      | 0      | 26     | 27     | 25     | 24     | 25     | 25     | 0      | 0      | 25     | 24     | 0      | 0      |
|                                                                  | 0.0%   | 0.0%   | 0.0%   | 0.0%   | 0.0%   | 0.0%   | 0.0%   | 0.7%   | 0.7%   | 0.8%   | 0.7%   | 0.7%   | 0.6%   | 0.0%   | 0.0%   | 0.7%   | 0.6%   | 0.0%   | 0.0%   |
| <b>pemetrexed</b>                                                | 22     | 23     | 23     | 25     | 0      | 0      | 0      | 0      | 0      | 0      | 0      | 0      | 0      | 0      | 0      | 0      | 0      | 0      | 0      |
|                                                                  | 0.5%   | 0.5%   | 0.5%   | 0.6%   | 0.0%   | 0.0%   | 0.0%   | 0.0%   | 0.0%   | 0.0%   | 0.0%   | 0.0%   | 0.0%   | 0.0%   | 0.0%   | 0.0%   | 0.0%   | 0.0%   | 0.0%   |
| <b>cyclophosphamide - doxorubicin - ofatumumab - vincristine</b> | 0      | 0      | 0      | 25     | 24     | 24     | 25     | 26     | 27     | 25     | 0      | 0      | 0      | 0      | 0      | 0      | 0      | 0      | 0      |
|                                                                  | 0.0%   | 0.0%   | 0.0%   | 0.6%   | 0.6%   | 0.7%   | 0.8%   | 0.7%   | 0.7%   | 0.8%   | 0.0%   | 0.0%   | 0.0%   | 0.0%   | 0.0%   | 0.0%   | 0.0%   | 0.0%   | 0.0%   |
| <b>cyclophosphamide - doxorubicin - rituximab</b>                | 22     | 23     | 23     | 0      | 0      | 0      | 0      | 0      | 0      | 0      | 0      | 0      | 0      | 0      | 0      | 0      | 0      | 0      | 0      |
|                                                                  | 0.5%   | 0.5%   | 0.5%   | 0.0%   | 0.0%   | 0.0%   | 0.0%   | 0.0%   | 0.0%   | 0.0%   | 0.0%   | 0.0%   | 0.0%   | 0.0%   | 0.0%   | 0.0%   | 0.0%   | 0.0%   | 0.0%   |
| <b>pentostatin</b>                                               | 22     | 23     | 0      | 25     | 24     | 0      | 0      | 0      | 0      | 0      | 0      | 0      | 0      | 0      | 0      | 0      | 0      | 0      | 0      |
|                                                                  | 0.5%   | 0.5%   | 0.0%   | 0.6%   | 0.6%   | 0.0%   | 0.0%   | 0.0%   | 0.0%   | 0.0%   | 0.0%   | 0.0%   | 0.0%   | 0.0%   | 0.0%   | 0.0%   | 0.0%   | 0.0%   | 0.0%   |
| <b>carboplatin - etoposide - ifosfamide</b>                      | 22     | 0      | 0      | 0      | 0      | 0      | 0      | 0      | 0      | 0      | 0      | 0      | 0      | 0      | 0      | 0      | 0      | 0      | 0      |
|                                                                  | 0.5%   | 0.0%   | 0.0%   | 0.0%   | 0.0%   | 0.0%   | 0.0%   | 0.0%   | 0.0%   | 0.0%   | 0.0%   | 0.0%   | 0.0%   | 0.0%   | 0.0%   | 0.0%   | 0.0%   | 0.0%   | 0.0%   |
| <b>cisplatin - gemcitabine</b>                                   | 0      | 0      | 0      | 0      | 0      | 0      | 0      | 0      | 0      | 0      | 0      | 0      | 0      | 0      | 52     | 50     | 48     | 0      | 0      |
|                                                                  | 0.0%   | 0.0%   | 0.0%   | 0.0%   | 0.0%   | 0.0%   | 0.0%   | 0.0%   | 0.0%   | 0.0%   | 0.0%   | 0.0%   | 0.0%   | 0.0%   | 1.4%   | 1.5%   | 1.3%   | 0.0%   | 0.0%   |
| <b>cyclophosphamide - fludarabine - methotrexate - rituximab</b> | 0      | 0      | 0      | 25     | 24     | 0      | 0      | 0      | 0      | 0      | 0      | 0      | 0      | 0      | 0      | 0      | 0      | 0      | 0      |
|                                                                  | 0.0%   | 0.0%   | 0.0%   | 0.6%   | 0.6%   | 0.0%   | 0.0%   | 0.0%   | 0.0%   | 0.0%   | 0.0%   | 0.0%   | 0.0%   | 0.0%   | 0.0%   | 0.0%   | 0.0%   | 0.0%   | 0.0%   |
| <b>ofatumumab - rituximab</b>                                    | 0      | 23     | 0      | 0      | 0      | 0      | 0      | 0      | 0      | 0      | 0      | 0      | 0      | 0      | 0      | 0      | 0      | 0      | 0      |
|                                                                  | 0.0%   | 0.5%   | 0.0%   | 0.0%   | 0.0%   | 0.0%   | 0.0%   | 0.0%   | 0.0%   | 0.0%   | 0.0%   | 0.0%   | 0.0%   | 0.0%   | 0.0%   | 0.0%   | 0.0%   | 0.0%   | 0.0%   |
| <b>cetuximab</b>                                                 | 0      | 0      | 23     | 25     | 24     | 0      | 25     | 26     | 0      | 0      | 0      | 0      | 0      | 0      | 0      | 0      | 0      | 0      | 0      |
|                                                                  | 0.0%   | 0.0%   | 0.5%   | 0.6%   | 0.6%   | 0.0%   | 0.8%   | 0.7%   | 0.0%   | 0.0%   | 0.0%   | 0.0%   | 0.0%   | 0.0%   | 0.0%   | 0.0%   | 0.0%   | 0.0%   | 0.0%   |
| <b>chlorambucil - ofatumumab</b>                                 | 0      | 0      | 0      | 0      | 0      | 24     | 25     | 26     | 27     | 0      | 0      | 0      | 0      | 0      | 0      | 0      | 0      | 0      | 0      |
|                                                                  | 0.0%   | 0.0%   | 0.0%   | 0.0%   | 0.0%   | 0.7%   | 0.8%   | 0.7%   | 0.7%   | 0.0%   | 0.0%   | 0.0%   | 0.0%   | 0.0%   | 0.0%   | 0.0%   | 0.0%   | 0.0%   | 0.0%   |
| <b>cyclophosphamide - lenalidomide - rituximab</b>               | 0      | 0      | 0      | 0      | 0      | 0      | 0      | 0      | 0      | 0      | 0      | 0      | 25     | 26     | 26     | 25     | 0      | 0      | 0      |
|                                                                  | 0.0%   | 0.0%   | 0.0%   | 0.0%   | 0.0%   | 0.0%   | 0.0%   | 0.0%   | 0.0%   | 0.0%   | 0.0%   | 0.0%   | 0.6%   | 0.7%   | 0.7%   | 0.7%   | 0.0%   | 0.0%   | 0.0%   |
| <b>bortezomib - rituximab</b>                                    | 0      | 0      | 0      | 0      | 0      | 0      | 0      | 0      | 0      | 0      | 0      | 0      | 0      | 26     | 26     | 25     | 24     | 0      | 0      |
|                                                                  | 0.0%   | 0.0%   | 0.0%   | 0.0%   | 0.0%   | 0.0%   | 0.0%   | 0.0%   | 0.0%   | 0.0%   | 0.0%   | 0.0%   | 0.0%   | 0.7%   | 0.7%   | 0.7%   | 0.6%   | 0.0%   | 0.0%   |
| <b>temozolomide</b>                                              | 0      | 0      | 0      | 0      | 0      | 0      | 0      | 0      | 0      | 0      | 0      | 0      | 0      | 0      | 26     | 25     | 24     | 26     | 0      |
|                                                                  | 0.0%   | 0.0%   | 0.0%   | 0.0%   | 0.0%   | 0.0%   | 0.0%   | 0.0%   | 0.0%   | 0.0%   | 0.0%   | 0.0%   | 0.0%   | 0.0%   | 0.7%   | 0.7%   | 0.6%   | 0.7%   | 0.0%   |
| <b>gemcitabine</b>                                               | 0      | 0      | 23     | 25     | 24     | 0      | 0      | 0      | 0      | 0      | 0      | 0      | 0      | 0      | 0      | 0      | 0      | 0      | 0      |
|                                                                  | 0.0%   | 0.0%   | 0.5%   | 0.6%   | 0.6%   | 0.0%   | 0.0%   | 0.0%   | 0.0%   | 0.0%   | 0.0%   | 0.0%   | 0.0%   | 0.0%   | 0.0%   | 0.0%   | 0.0%   | 0.0%   | 0.0%   |
| <b>fluorouracil</b>                                              | 22     | 23     | 0      | 0      | 0      | 0      | 0      | 0      | 0      | 0      | 0      | 0      | 0      | 0      | 0      | 0      | 0      | 0      | 0      |
|                                                                  | 0.5%   | 0.5%   | 0.0%   | 0.0%   | 0.0%   | 0.0%   | 0.0%   | 0.0%   | 0.0%   | 0.0%   | 0.0%   | 0.0%   | 0.0%   | 0.0%   | 0.0%   | 0.0%   | 0.0%   | 0.0%   | 0.0%   |
| <b>cisplatin - docetaxel</b>                                     | 22     | 23     | 23     | 0      | 0      | 0      | 0      | 0      | 0      | 0      | 0      | 0      | 0      | 0      | 0      | 0      | 0      | 0      | 0      |
|                                                                  | 0.5%   | 0.5%   | 0.5%   | 0.0%   | 0.0%   | 0.0%   | 0.0%   | 0.0%   | 0.0%   | 0.0%   | 0.0%   | 0.0%   | 0.0%   | 0.0%   | 0.0%   | 0.0%   | 0.0%   | 0.0%   | 0.0%   |
| <b>carboplatin - gemcitabine</b>                                 | 0      | 0      | 0      | 0      | 0      | 0      | 0      | 26     | 27     | 25     | 0      | 0      | 0      | 0      | 0      | 0      | 0      | 0      | 0      |
|                                                                  | 0.0%   | 0.0%   | 0.0%   | 0.0%   | 0.0%   | 0.0%   | 0.0%   | 0.7%   | 0.7%   | 0.8%   | 0.0%   | 0.0%   | 0.0%   | 0.0%   | 0.0%   | 0.0%   | 0.0%   | 0.0%   | 0.0%   |
| <b>sipuleucel-t</b>                                              | 0      | 0      | 0      | 0      | 0      | 0      | 0      | 26     | 27     | 25     | 0      | 0      | 0      | 0      | 0      | 0      | 0      | 0      | 0      |
|                                                                  | 0.0%   | 0.0%   | 0.0%   | 0.0%   | 0.0%   | 0.0%   | 0.0%   | 0.7%   | 0.7%   | 0.8%   | 0.0%   | 0.0%   | 0.0%   | 0.0%   | 0.0%   | 0.0%   | 0.0%   | 0.0%   | 0.0%   |
| <b>carboplatin - paclitaxel albumin bound</b>                    | 0      | 0      | 0      | 0      | 0      | 0      | 0      | 0      | 0      | 0      | 0      | 0      | 0      | 26     | 26     | 25     | 0      | 0      | 0      |
|                                                                  | 0.0%   | 0.0%   | 0.0%   | 0.0%   | 0.0%   | 0.0%   | 0.0%   | 0.0%   | 0.0%   | 0.0%   | 0.0%   | 0.0%   | 0.0%   | 0.7%   | 0.7%   | 0.7%   | 0.0%   | 0.0%   | 0.0%   |
